# Supplementary material for: Cell-Free Supernatants (CFSs) from the Culture of Bacillus subtilis Inhibit Pseudomonas sp. Biofilm Formation
Source: MDPI journal article supplement (doi:10.3390/microorganisms10112105), 2022-10-24
Supplement: s1 [file s1]

# Cell-Free Supernatants (CFSs) from the Culture of *Bacillus subtilis* Inhibit *Pseudomonas* sp. Biofilm Formation

Shirmin Islam <sup>1</sup>, Md. Liton Mahmud <sup>1</sup>, Waleed H. Almalki <sup>2,\*</sup>, Suvro Biswas <sup>1</sup>, Md. Ariful Islam <sup>1</sup>, Md. Golam Mortuza <sup>3</sup>, Mohammad Akbar Hossain <sup>4</sup>, Md. Akhtar-E Ekram <sup>1</sup>, Md. Salah Uddin <sup>1</sup>, Shahriar Zaman <sup>1</sup> and Md. Abu Saleh <sup>1,\*</sup>

<sup>1</sup> Microbiology Laboratory, Department of Genetic Engineering and Biotechnology, University of Rajshahi, Rajshahi 6205, Bangladesh

<sup>2</sup> Department of Pharmacology and Toxicology, Faculty of Medicine, Umm Al-Qura University, Makkah 21955, Saudi Arabia

<sup>3</sup> Department of Science and Humanities, Bangladesh Army International University of Science and Technology, Cumilla 3500, Bangladesh

<sup>4</sup> Department of Pharmacology and Toxicology, Faculty of Medicine in Al-Qunfudah, Umm Al-Qura University, Makkah 21955, Saudi Arabia

\* Correspondence: whmalki@uqu.edu.sa (W.H.A.); saleh@ru.ac.bd (M.A.S.)

**Table S1: List of bacterial strains used for the antagonistic test**

| Sl. no. | Name of the used bacterial strains |
|---------|------------------------------------|
| 01      | <i>Klebsiella pneumoniae</i>       |
| 02      | <i>Pseudomonas</i> sp.             |
| 03      | <i>Escherichia coli</i>            |
| 04      | <i>Staphylococcus aureus</i>       |

**Table S2: Ligand No, PubChem CID of the molecules identified through GC-MS based and their docking score**

| Compounds                                                             | CID     | R.T    | Area Percentage | Docking Score |
|-----------------------------------------------------------------------|---------|--------|-----------------|---------------|
| 1. 1-Butanol, 3-methyl-                                               | 31260   | 1.965  | 0.06            | -4.2          |
| 2. Disulfide, dimethyl                                                | 12232   | 4.327  | 6.06            | -2.3          |
| 3. Butanoic acid, 2-methyl-                                           | 8314    | 6.933  | 0.19            | -4.6          |
| 4. Oxime-, methoxy-phenyl-                                            | 9602988 | 7.346  | 0.21            | -5.0          |
| 5. 2-Heptanone                                                        | 8051    | 7.531  | 0.67            | -4.9          |
| 6. Anisole                                                            | 7519    | 8.104  | 0.46            | -4.9          |
| 7. Hexanoic acid, methyl ester                                        | 7824    | 8.25   | 0.08            | -4.9          |
| 8. 2-Heptanone, 4-methyl-                                             | 94317   | 8.507  | 0.1             | -4.0          |
| 9. 1-(9H-Fluoren-2-yl)-2-(1-phenyl-1H-tetrazol-5-ylsulfanyl)-ethanone | 606333  | 8.755  | 0.15            | -7.0          |
| 10. Dimethyl trisulfide                                               | 19310   | 8.821  | 0.86            | -2.6          |
| 11. Benzaldehyde                                                      | 240     | 9.045  | 0.18            | -4.8          |
| 12. Pentasulfide, dimethyl                                            | 81772   | 9.184  | 8.51            | -2.4          |
| 13. 3-Cyclopentyl-1-propyne                                           | 521007  | 9.411  | 14.45           | -5.4          |
| 14. Phenol, 2-chloro-                                                 | 7245    | 9.597  | 2.34            | -4.4          |
| 15. Pyridine, 2,3,6-trimethyl-                                        | 15100   | 9.696  | 1.74            | -5.8          |
| 16. Propanoic acid, 2,2-dimethyl-, propyl ester                       | 138418  | 9.776  | 1.02            | -4.2          |
| 17. Pyrazine, trimethyl-                                              | 26808   | 9.866  | 0.63            | -5.2          |
| 18. Diethylene glycol tert-butyl ether methyl ether                   | 104324  | 10.003 | 0.24            | -4.3          |
| 19. Benzene, 1,4-dichloro-                                            | 4685    | 10.09  | 0.13            | -5.0          |
| 20. Butane, 1-[(1-methylethyl)thio]-                                  | 522478  | 10.15  | 0.15            | -3.4          |
| 21. 5-Hydroxy-hex-2-enoic acid, methyl ester                          | 5369246 | 10.22  | 0.13            | -5.0          |
| 22. 5-Chloropentanoic acid, 2-ethylcyclohexyl ester                   | 544276  | 10.262 | 0.19            | -4.7          |

|                                                                                                   |           |        |      |      |
|---------------------------------------------------------------------------------------------------|-----------|--------|------|------|
| 23. 2-Ethyl-1-hexanol                                                                             | 7720      | 10.319 | 0.18 | -4.8 |
| 24. D-Limonene                                                                                    | 440917    | 10.355 | 0.21 | -5.8 |
| 25. Propane, 2-(chloromethyl)-1,3-dimethoxy-2-methyl-                                             | 542360    | 10.527 | 0.21 | -3.5 |
| 26. Oxirane, 2-[2-(benzyloxy)-1-(1-methoxy-1-methylethoxy)ethyl]                                  | 552649    | 10.626 | 0.23 | -4.8 |
| 27. 2-Nonanone                                                                                    | 13187     | 10.773 | 0.11 | -5.0 |
| 28. Propionic acid, (3,6,7,8-tetrahydro-3,7-methano-2,4,6-trimethyl-2H-oxocin-7-yl)methyl ester   | 583617    | 10.848 | 0.11 | -5.7 |
| 29. Pyrazine, 3-ethyl-2,5-dimethyl-                                                               | 25916     | 11.203 | 0.56 | -4.4 |
| 30. 1-Heptanol, 2,4-dimethyl-,                                                                    | 101564277 | 11.28  | 0.1  | -5.4 |
| 31. o-Toluic acid, 2-ethylhexyl ester                                                             | 577168    | 11.363 | 0.36 | -5.5 |
| 32. 2-Nonanone                                                                                    | 13187     | 11.43  | 0.92 | -5.0 |
| 33. 2,5-Dihydroxybenzaldehyde, 2TMS derivative                                                    | 622536    | 11.476 | 1.27 | -4.0 |
| 34. 2,2'-Anhydro-1-arabinofuranosyluracil                                                         | 569411    | 11.55  | 0.12 | -6.0 |
| 35. 1-Heptanol, 2-propyl-                                                                         | 24847     | 11.617 | 0.23 | -4.5 |
| 36. Nonanal                                                                                       | 31289     | 11.675 | 0.1  | -4.2 |
| 37. Succinic acid, 3,7-dimethyloct-6-en-1-yl pentyl ester                                         | 91702362  | 11.748 | 0.19 | -4.1 |
| 38. Phorone                                                                                       | 10438     | 11.79  | 0.16 | -5.1 |
| 39. Phenylethyl Alcohol                                                                           | 6054      | 11.873 | 0.37 | -5.1 |
| 40. Benzene, 1-chloro-4-methoxy-                                                                  | 12167     | 11.99  | 0.29 | -4.2 |
| 41. Silane, dimethyl(dimethyl(dimethyl(2-isopropylphenoxy)silyloxy)silyloxy)(2-isopropylphenoxy)- | 91743286  | 12.015 | 0.19 | -3.3 |
| 42. Benzenemethanol, 4-methyl-                                                                    | 11505     | 12.264 | 0.22 | -5.5 |
| 43. 2,6-Dodecadien-1-al                                                                           | 6430759   | 12.387 | 0.1  | -5.2 |
| 44. (+)-3-Carene, 2-(acetylmethyl)-                                                               | 576614    | 12.546 | 0.2  | -5.4 |
| 45. Hexadecanal, 2-methyl-                                                                        | 546976    | 12.634 | 0.06 | -5.1 |
| 46. 1-Methoxy-2-methyl-4-(methylthio)benzene                                                      | 592820    | 12.724 | 0.22 | -4.4 |

|                                                                                        |          |        |       |      |
|----------------------------------------------------------------------------------------|----------|--------|-------|------|
| 47. 1,3-Propanediol, 2-butyl-2-ethyl-                                                  | 61038    | 12.83  | 0.14  | -4.6 |
| 48. Neophytadiene                                                                      | 10446    | 12.943 | 1.36  | -4.6 |
| 49. n-Decyl methylphosphonofluoridate                                                  | 567104   | 13.104 | 0.35  | -4.6 |
| 50. Azulene                                                                            | 9231     | 13.184 | 0.31  | -5.8 |
| 51. Fumaric acid, 2,5-dimethylphenyl nonyl ester                                       | 91711256 | 13.28  | 0.22  | -5.4 |
| 52. 16-Methyl-heptadecane-1,2-diol, trimethylsilyl ether                               | 91742675 | 13.565 | 0.12  | -3.4 |
| 53. Tetrasulfide, dimethyl                                                             | 79828    | 13.677 | 2.24  | -2.3 |
| 54. Benzothiazole                                                                      | 7222     | 13.834 | 1.51  | -5.1 |
| 55. Benzene, 1,3-bis(1,1-dimethylethyl)-                                               | 71343282 | 14.086 | 0.75  | -5.8 |
| 56. 1,7-Di(3-ethylphenyl)-2,2,4,4,6,6-hexamethyl-1,3,5,7-tetraoxa-2,4,6-trisilaheptane | 91742720 | 14.203 | 0.05  | -7.1 |
| 57. Bicyclo[3.2.0]hepta-3,6-diene-1-carbonitrile                                       | 575776   | 14.88  | 10.91 | -4.5 |
| 58. o-Methoxymandelic acid, 2TMS derivative                                            | 530206   | 14.992 | 0.33  | -4.1 |
| 59. Pyrazine, 2,5-dimethyl-3-(3-methylbutyl)-                                          | 519564   | 15.044 | 0.19  | -5.3 |
| 60. Trichloroacetic acid, 6-ethyl-3-octyl ester                                        | 550155   | 15.105 | 0.05  | -4.9 |
| 61. 3-tert-Butyl-2-pyrazolin-5-one                                                     | 520421   | 15.169 | 0.21  | -5.2 |
| 62. E-10,13,13-Trimethyl-11-tetradecen-1-ol acetate                                    | 5365074  | 15.565 | 0.05  | -4.5 |
| 63. 3,5-Dibutoxy-1,1,1,7,7,7-hexamethyl-3,5-bis(trimethylsiloxy)tetrasiloxane          | 551995   | 15.885 | 0.71  | -3.4 |
| 64. Dodecanedioic acid, 2TBDMS derivative                                              | 634058   | 15.745 | 0.08  | -4.2 |
| 65. 3-(2-Hydroxy-cyclopentylidene)-2-methyl-propionic acid                             | 5369050  | 15.824 | 0.13  | -5.2 |
| 66. Ethane, 2-chloro-1-ethoxy-1-methoxy-                                               | 548381   | 15.94  | 0.08  | -3.4 |
| 67. Dodecanedioic acid, 2TBDMS derivative                                              | 634058   | 15.968 | 0.09  | -3.5 |
| 68. 16-Methyl-heptadecane-1,2-diol, trimethylsilyl ether                               | 91742675 | 16.005 | 0.06  | -4.3 |
| 69. 3,5-Dibutoxy-1,1,1,7,7,7-hexamethyl-3,5-bis(trimethylsiloxy)tetrasiloxane          | 551995   | 16.105 | 0.2   | -4.2 |
| 70. 1-Heptacosanol                                                                     | 74822    | 16.175 | 0.05  | -4.7 |

|                                                                           |          |        |      |      |
|---------------------------------------------------------------------------|----------|--------|------|------|
| 71. Tetradecane                                                           | 12389    | 16.287 | 0.12 | -5.0 |
| 72. Dodecanedioic acid, 2TBDMS derivative                                 | 634058   | 16.388 | 0.11 | -4.1 |
| 73. Carbonic acid, 2-ethylhexyl heptadecyl ester                          | 91693166 | 16.45  | 0.06 | -5.0 |
| 74. 2-Piperidinone, N-[4-bromo-n-butyl]-                                  | 536377   | 16.58  | 0.05 | -4.4 |
| 75. 2,5-di-tert-Butyl-1,4-benzoquinone                                    | 17161    | 17.337 | 0.19 | -5.6 |
| 76. 2-Dodecen-1-yl(-)succinic anhydride                                   | 5362708  | 17.524 | 0.13 | -5.2 |
| 77. 2-Tridecanone                                                         | 11622    | 17.593 | 0.33 | -4.3 |
| 78. Phenol, 3,5-bis(1,1-dimethylethyl)-                                   | 5614     | 17.777 | 4.66 | -4.2 |
| 79. N1,N1,N4-Tris(tert-butyldimethylsilyl)succinamide                     | 91744783 | 17.98  | 0.29 | -4.3 |
| 80. Bis(pentamethylcyclotrisiloxy)tetramethyldisiloxane                   | 553163   | 18.062 | 0.07 | -6.2 |
| 81. 1,4-Methanobenzocyclodecene,<br>1,2,3,4,4a,5,8,9,12,12a-decahydro-    | 556414   | 19.992 | 0.04 | -4.3 |
| 82. 1,1,1,3,5,7,9,11,11,11-Decamethyl-5-<br>(trimethylsiloxy)hexasiloxane | 6329082  | 20.093 | 0.18 | -4.8 |
| 83. Oxalic acid, cyclohexylmethyl tridecyl ester                          | 6421725  | 20.658 | 1.33 | -6.4 |
| 84. 7,9-Di-tert-butyl-1-oxaspiro(4,5)deca-6,9-diene-2,8-<br>dione         | 545303   | 24.3   | 0.25 | -3.3 |
| 85. Tetracosamethyl-cyclododecasiloxane                                   | 167767   | 36.94  | 0.85 | -3.6 |

**Table S3:** Protein-Ligand interactions of Caseinolytic proteases (Clp)) enzymes (PDB ID: 7M1M) with top 8 volatile compounds of *Bacillus subtilis*

| Compound Name                                                      | Hydrogen bond |               | Hydrophobic bond |               |
|--------------------------------------------------------------------|---------------|---------------|------------------|---------------|
|                                                                    | Residues      | Distance (Å°) | Residues         | Distance (Å°) |
| 1-(9H-Fluoren-2-yl)-2-(1-phenyl-1H-tetrazol-5-ylsulfanyl)-ethanone |               |               | Met-41           | 5.8           |
|                                                                    |               |               | Tyr-22           | 4.40          |

|                                                     |        |      |        |      |
|-----------------------------------------------------|--------|------|--------|------|
|                                                     |        |      | Tyr-22 | 4.04 |
| Oxalic acid, cyclohexylmethyl tridecyl ester        | Thr-22 | 4.46 |        |      |
|                                                     | Thr-22 | 5.15 |        |      |
| Bis(pentamethylcyclotrisiloxy)tetramethyldisiloxane | Gln-48 | 5.27 | Tyr-22 | 4.19 |
|                                                     |        |      | Tyr-22 | 4.48 |
|                                                     |        |      | Tyr-22 | 4.57 |
|                                                     |        |      | Tyr-22 | 5.36 |
|                                                     |        |      | Tyr-22 | 4.78 |
|                                                     |        |      | Val-5  |      |
| 2,2'-Anhydro-1-arabinofuranosyluracil               | Val-34 | 3.17 | Met-41 | 5.59 |
|                                                     | Val-34 | 4.24 | Tyr-22 | 4.21 |
